# Supplementary material for: Effect of ATorvastatin On Chronic subdural Hematoma (ATOCH): a study protocol for a randomized controlled trial
Source: PubMed Central journal article supplement (PMC4652431; doi:10.1186/s13063-015-1045-y), 2015-11-18
Supplement: 13063_2015_1045_MOESM1_ESM.pdf [file 13063_2015_1045_MOESM1_ESM.pdf]

## Medical Centers in China Participating in the Study

| Medical Centers                                                                              | Ethics Committee                                                                                            | Certificate No.    |
|----------------------------------------------------------------------------------------------|-------------------------------------------------------------------------------------------------------------|--------------------|
| 1.Tianjin Medical University, General Hospital                                               | Medical Ethics Committee of Tianjin medical university general hospital                                     | IRB2012-028-02     |
| 2.Peking Union Medical College Hospital                                                      | Ethics Committee of Peking Union Medical College Hospital Affiliated to Chinese Academy of Medical Sciences | B-107              |
| 3.Prince of Wales Hospital, Hong Kong                                                        | Pharmacy and Poisons Board of Hong Kong                                                                     | PR/CT0257/2014(SC) |
| 4.Qilu Hospital of Shandong University                                                       | Medical Ethics Committee of Qilu Hospital Affiliated to Shandong University                                 | No.2013049         |
| 5.The first affiliated hospital of zhengzhou university                                      | Clinical trial ethics committee of the first affiliated hospital of zhengzhou university                    | MED-2014-09        |
| 6.The Second Affiliated Hospital of Zhejiang University School of Medicine                   | Human research ethics committee of the Second Affiliated Hospital of Zhejiang University School of Medicine | STU-2014-104       |
| 7.First affiliated hospital of fujian medical university                                     | Medical Ethics Committee of First affiliated hospital of fujian medical university                          | [2014]053          |
| 8.First affiliated hospital of shanxi medical university                                     | Science / Medical experimental ethics committee of First affiliated hospital of shanxi medical university   | BHR-I00-301        |
| 9.General hospital of Ningxia medical university                                             | Scientific experiment ethics committee of Ningxia medical university General hospital                       | No.20140709        |
| 10.Linyi People's Hospital                                                                   | Medical Ethics Committee of Linyi People's Hospital                                                         | No.2014047         |
| 11.Southwest Hospital The First Affiliated Hospital of the Third Military Medical University | Ethics Committee of the First Affiliated Hospital of Third Military Medical University, PLA                 | No.2014-20         |
| 12.Tangdu Hospital, The Second Affiliated hospital of the Forth Military Medical University  | IEC of Institution for National Drug Clinical Trials, Tangdu Hospital, Forth Military Medical University    | No.2014064         |
| 13.The affiliated hospital of Xuzhou medical college                                         | Medical Ethics Committee of affiliated hospital of Xuzhou medical college                                   | XYFY2014025        |
| 14.The First Affiliated hospital of Harbin Medical University                                | Medical Ethics Committee of First hospital Affiliated to Harbin Medical University                          | No.201336          |
| 15.Xijing Hospital, The First Affiliated hospital of the Forth Military Medical University   | IEC of First Affiliated hospital of Forth Military Medical University                                       | KY20140813         |
| 16.Inner Mongolia people's hospital                                                          | Ethics Committee of Inner Mongolia people's hospital                                                        | B-20140627         |
