# Supplementary material for: Effect of ATorvastatin On Chronic subdural Hematoma (ATOCH): a study protocol for a randomized controlled trial
Source: PubMed Central journal article supplement (PMC4652431; doi:10.1186/s13063-015-1045-y), 2015-11-18
Supplement: 13063_2015_1045_MOESM2_ESM.pdf [file 13063_2015_1045_MOESM2_ESM.pdf]

## MGS-GCS

Patients were evaluated using the Glasgow Coma Scale and Markwalder's Grading Scale

| Patient's Grade | Glasgow Coma Scale                      | Markwalder's Grading Scale                                                                                                |
|-----------------|-----------------------------------------|---------------------------------------------------------------------------------------------------------------------------|
| Grade 0         | Glasgow Coma Scale score of 15          | Normal neurological status without any symptoms                                                                           |
| Grade 1         | Glasgow Coma Scale score of 15          | Without neurological deficits, but with symptoms such as headache or unsteady gait                                        |
| Grade 2         | Glasgow Coma Scale score of 13 to 14    | Focal neurological deficits, such as drowsiness or disorientation, or variable neurological deficits, such as hemiparesis |
| Grade 3         | Glasgow Coma Scale score of 9 to 12     | With stupor but appropriate responses to noxious stimuli and several focal neurological signs such as hemiplegia          |
| Grade 4         | Glasgow Coma Scale score of less than 9 | Coma with absent motor responses to noxious stimuli and decerebrate or decorticate posturing                              |

Only patients with Grade 0-2 CSDH were selected for atorvastatin treatment in this study.

### References:

1. Markwalder TM, Steinsiepe KF, Rohner M, Reichenbach W, Markwalder H. The course of chronic subdural hematomas after burr-hole craniostomy and closed-system drainage. *Journal of neurosurgery*. Sep 1981;55(3):390-396.
2. Sun TF, Boet R, Poon WS. Non-surgical primary treatment of chronic subdural haematoma: Preliminary results of using dexamethasone. *British journal of neurosurgery*. Aug 2005;19(4):327-333.
